# Supplementary material for: Host Factors in the Natural History of Chronic Hepatitis B: Role of Genetic Determinants
Source: Hindawi journal article supplement (doi:10.1155/2022/6046677), 2022-08-23
Supplement: f1 [file 6046677.f1.pdf]

**Supplementary Table 1.** Demography, liver biochemistry, HBV viral load, and genetic determinants of subjects in IT and IC phases.

| Parameter                         | Overall          | Phase            |                    | p-value |
|-----------------------------------|------------------|------------------|--------------------|---------|
|                                   |                  | IT               | IC                 |         |
| Age (years), median (IQR)         | 36 (28–49)       | 36 (28–48)       | 36 (30–51)         | 0.565   |
| Age group, n                      | 102              | 74               | 28                 |         |
| <40 years (%)                     | 55 (53.9)        | 39 (52.7)        | 16 (57.1)          | 0.688   |
| ≥40 years (%)                     | 47 (46.1)        | 35 (47.3)        | 12 (42.9)          |         |
| Gender, n                         | 102              | 74               | 28                 |         |
| Male (%)                          | 71 (69.6)        | 53 (71.6)        | 18 (64.3)          | 0.472   |
| Female (%)                        | 31 (30.4)        | 21 (28.4)        | 10 (35.7)          |         |
| Liver biochemistry                |                  |                  |                    |         |
| AST (U/l), median (IQR)           | 35.0 (23.0–65.5) | 28.0 (22.0–39.0) | 112.0 (81.0–149.0) | <0.001* |
| ALT (U/l), median (IQR)           | 39.0 (24.5–74.0) | 31.0 (30.0–46.5) | 116.5 (85.0–179.0) | 0.002*  |
| HBV viral load                    |                  |                  |                    |         |
| HBV DNA (log <sub>10</sub> IU/mL) | 6.25 (4.03–7.52) | 6.07 (3.68–8.03) | 6.27 (5.19–6.97)   | 0.177   |
| Genetic determinants              |                  |                  |                    |         |
| TNF-α -308 SNP, n                 | 57               | 40               | 17                 |         |
| GG, n (%)                         | 53 (93.0)        | 38 (95.0)        | 15 (88.2)          | 0.658   |
| GA, n (%)                         | 2 (3.5)          | 1 (2.5)          | 1 (5.9)            |         |
| AA, n (%)                         | 2 (3.5)          | 1 (2.5)          | 1 (5.9)            |         |
| IL-10 -592 SNP, n                 | 94               | 67               | 27                 |         |
| AA, n (%)                         | 55 (58.5)        | 41 (61.2)        | 14 (51.9)          | 0.408   |
| AC, n (%)                         | 28 (29.8)        | 20 (29.9)        | 8 (29.6)           |         |
| CC, n (%)                         | 11 (11.7)        | 6 (9.0)          | 5 (18.5)           |         |
| IL-10 -1082 SNP, n                | 66               | 44               | 22                 |         |
| GG, n (%)                         | 66 (100)         | 44 (26.3)        | 22 (13.2)          | N/A     |
| GA, n (%)                         | 0                | 0                | 0                  |         |
| AA, n (%)                         | 0                | 0                | 0                  |         |

**Supplementary Table 2.** Factors independently associated with the dynamics of chronic hepatitis B (CHB) as determined using multivariate binomial logistic regression with backward elimination. Genotype AC was included with the dominant genotype (AA).

| Dependent Variables                                                       | OR    | 95% CI       | p-value   |
|---------------------------------------------------------------------------|-------|--------------|-----------|
| <b>IT and IC to HBeAg-seroconversion (LR) (n=133)</b>                     |       |              |           |
| Male                                                                      | 0.536 | 0.243–1.178  | 0.121     |
| Age ≥ 40                                                                  | 2.194 | 1.069–4.580  | 0.034*    |
| IL-10 -592 CC                                                             | 1.419 | 0.402–4.984  | 0.579     |
| <b>IT and IC to No HBeAg-seroconversion (ENH) (n=138)</b>                 |       |              |           |
| Male                                                                      | 1.328 | 0.531–3.410  | 0.547     |
| Age ≥ 40                                                                  | 7.470 | 3.323–18.320 | <0.001*** |
| IL-10 -592 CC                                                             | 0.702 | 0.128–3.356  | 0.662     |
| <b>HBeAg-seroconversion (LR) to No HBeAg-seroconversion (ENH) (n=109)</b> |       |              |           |
| Male                                                                      | 4.066 | 1.597–11.005 | 0.004**   |
| Age ≥ 40                                                                  | 5.275 | 2.013–14.954 | 0.001**   |
| IL-10 -592 CC                                                             | 0.251 | 0.046–1.127  | 0.082     |

IT, immune tolerant; IC, immune clearance; LR, low replicative; ENH, HBeAg-negative immune reactivation; OR, odds ratio; CI, confidence interval, \*\*\*P<0.001; \*\*P<0.01; \*P<0.05.

**Supplementary Table 3.** Factors independently associated with the dynamics of chronic hepatitis B (CHB) as determined using multivariate binomial logistic regression with backward elimination. Genotype AC was included with the recessive genotype (CC).

| <b>Dependent Variables</b>                                                | <b>OR</b> | <b>95% CI</b> | <b>p-value</b> |
|---------------------------------------------------------------------------|-----------|---------------|----------------|
| <b>IT and IC to HBeAg-seroconversion (LR) (n=133)</b>                     |           |               |                |
| Male                                                                      | 0.528     | 0.239–1.156   | 0.111          |
| Age ≥ 40                                                                  | 2.217     | 1.081–4.624   | 0.031*         |
| IL10 -592 CC                                                              | 1.066     | 0.504–2.240   | 0.865          |
| <b>IT and IC to No HBeAg-seroconversion (ENH) (n=138)</b>                 |           |               |                |
| Male                                                                      | 1.305     | 0.517–3.385   | 0.575          |
| Age ≥ 40                                                                  | 7.446     | 3.313–18.255  | <0.001***      |
| IL10 -592 CC                                                              | 1.128     | 0.513–2.478   | 0.763          |
| <b>HBeAg-seroconversion (LR) to No HBeAg-seroconversion (ENH) (n=109)</b> |           |               |                |
| Male                                                                      | 3.701     | 1.486–9.731   | 0.006**        |
| Age ≥ 40                                                                  | 4.568     | 1.785–12.584  | 0.002**        |
| IL10 -592 CC                                                              | 1.137     | 0.491–2.638   | 0.764          |

IT, immune tolerant; IC, immune clearance; LR, low replicative; ENH, HBeAg-negative immune reactivation; OR, odds ratio; CI, confidence interval, \*\*\*P<0.001; \*\*P<0.01; \*P<0.05.
